# Supplementary material for: A fault-tolerant method for HLA typing with PacBio data
Source: PubMed Central journal article supplement (PMC4161847; doi:10.1186/1471-2105-15-296), 2014-09-03
Supplement: 12859_2014_6558_MOESM1_ESM.pdf [file 12859_2014_6558_MOESM1_ESM.pdf]

# A Fault-tolerant Method for HLA Typing with PacBio Data

Chia-Jung Chang<sup>1</sup>, Pei-Lung Chen<sup>2,3,4,5</sup>, Wei-Shiung Yang<sup>2,3,4</sup>, and Kun-Mao Chao<sup>1,6</sup>

<sup>1</sup> Department of Computer Science and Information Engineering, National Taiwan University, No.1, Sec.4, Roosevelt Road, Taipei, Taiwan (R.O.C.), 10617.

<sup>2</sup> Departments of Medical Genetics and Internal Medicine, National Taiwan University Hospital, No. 8, Chung Shan S. Road, Taipei, Taiwan (R.O.C.), 10041.

<sup>3</sup> Graduate Institute of Clinical Medicine, National Taiwan University College of Medicine, No. 1, Sec. 1, Jen Ai Road, Taipei, Taiwan (R.O.C.), 10051.

<sup>4</sup> Research Center for Developmental Biology and Regenerative Medicine, National Taiwan University, No.1, Sec. 4, Roosevelt Road, Taipei, Taiwan (R.O.C.), 10617.

<sup>5</sup> Graduate Institute of Medical Genomics and Proteomics, National Taiwan University, No.1, Sec.4, Roosevelt Road, Taipei, Taiwan (R.O.C.), 10617.

<sup>6</sup> Graduate Institute of Biomedical Electronics and Bioinformatics, National Taiwan University, No.1, Sec.4, Roosevelt Road, Taipei, Taiwan (R.O.C.), 10617.

**Additional file 1**

**Table S1.** Three types of experiments with the same number of reads

| A    |          | B    |          | DRB1    |          |
|------|----------|------|----------|---------|----------|
| Name | Freq (%) | Name | Freq (%) | Name    | Freq (%) |
| A*01 | 0.30     | B*07 | 0.30     | DRB1*01 | 0.30     |
| A*02 | 31.70    | B*08 | 0.10     | DRB1*03 | 8.40     |
| A*03 | 0.30     | B*13 | 8.30     | DRB1*04 | 14.80    |
| A*11 | 34.90    | B*14 | 0.10     | DRB1*07 | 2.20     |
| A*23 | 0.10     | B*15 | 13.10    | DRB1*08 | 9.10     |
| A*24 | 16.60    | B*18 | 0.20     | DRB1*09 | 15.40    |
| A*25 | 0.10     | B*27 | 2.70     | DRB1*10 | 0.50     |
| A*26 | 1.30     | B*35 | 1.50     | DRB1*11 | 8.00     |
| A*29 | 0.10     | B*37 | 0.20     | DRB1*12 | 14.10    |
| A*30 | 1.20     | B*38 | 3.70     | DRB1*13 | 3.70     |
| A*31 | 1.20     | B*39 | 2.60     | DRB1*14 | 6.40     |
| A*32 | 0.20     | B*40 | 24.20    | DRB1*15 | 9.90     |
| A*33 | 11.60    | B*41 | 0.10     | DRB1*16 | 3.90     |
| A*34 | 0.10     | B*42 | 0.10     |         |          |
| A*36 | 0.10     | B*44 | 0.50     |         |          |
| A*43 | 0.10     | B*45 | 0.10     |         |          |
| A*66 | 0.10     | B*46 | 14.60    |         |          |
| A*68 | 0.10     | B*47 | 0.10     |         |          |
| A*69 | 0.10     | B*48 | 1.20     |         |          |
| A*74 | 0.10     | B*49 | 0.10     |         |          |
| A*80 | 0.10     | B*50 | 0.10     |         |          |
|      |          | B*51 | 6.00     |         |          |
|      |          | B*52 | 0.80     |         |          |
|      |          | B*53 | 0.30     |         |          |
|      |          | B*54 | 2.50     |         |          |
|      |          | B*55 | 3.00     |         |          |
|      |          | B*56 | 0.80     |         |          |
|      |          | B*57 | 0.80     |         |          |
|      |          | B*58 | 10.70    |         |          |
|      |          | B*59 | 0.10     |         |          |
|      |          | B*67 | 0.10     |         |          |
|      |          | B*73 | 0.10     |         |          |
|      |          | B*78 | 0.10     |         |          |
|      |          | B*81 | 0.10     |         |          |
|      |          | B*82 | 0.10     |         |          |
|      |          | B*83 | 0.10     |         |          |

**Table S2.** Twenty four samples with ambiguous alleles.

| allele 1      | allele 2   |
|---------------|------------|
| A*02:01:01:01 | A*02:54    |
| A*02:37       | A*02:06:01 |
| A*02:01:22    | A*02:474   |
| A*02:07:01    | A*02:06:04 |
| A*23:01:13    | A*24:156   |
| A*24:02:58    | A*23:51    |
| A*02:127      | A*02:364   |
| A*02:170      | A*02:167   |
| A*02:64       | A*02:170   |
| A*02:364      | A*02:178   |
| A*11:16       | A*11:116   |
| A*11:140      | A*11:73    |
| A*02:01:22    | A*02:300   |
| A*02:110      | A*02:06:04 |
| A*02:12       | A*02:404   |
| A*02:423      | A*02:142   |
| A*02:03:01    | A*02:438   |
| A*02:190      | A*02:355   |
| A*31:01:05    | A*33:18:01 |
| A*31:06       | A*33:03:05 |
| A*02:40:01    | A*02:438   |
| A*02:190      | A*02:51    |
| A*01:26       | A*11:39    |
| A*01:136      | A*11:94    |

**Table S3.** The contingency table for Type 1 experiments

|          | homozygous | heterozygous |
|----------|------------|--------------|
| #correct | 4075       | 7868         |
| #error   | 25         | 32           |

**Table S4.** The contingency table for Type 2 experiments

|          | homozygous | heterozygous |
|----------|------------|--------------|
| #correct | 6720       | 15814        |
| #error   | 330        | 1136         |

**Table S5.** The contingency table for Type 3 experiments

|          | homozygous | heterozygous |
|----------|------------|--------------|
| #correct | 9950       | 21798        |
| #error   | 3850       | 12402        |
